# Supplementary material
Source: PubMed Central journal article supplement (PMC3340229)

## SUPPLEMENTAL DATA

### SUPPLEMENTAL FIGURES

FIGURE S1. **Specificity of PIP2 antibody tested with lipid strips.** Specificity of PIP2 antibody was tested with lipid strips. The lipids tested (SIP, sphingosine 1-phosphate; PA, phosphatidic acid) and intensity of signals are as indicated. For more details and other lipids tested with negative results see Experimental Procedures.

FIGURE S2. **BH profiles of DMIB with mutated BH-site.** (A) Original and mutated sequences of BH-sites are shown at the top of each profile. Basic residues are in bold and mutated residues are underlined. Mutations are: dBH, deletion of the BH-site; BH-Ala, all basic residues in the BH-site replaced with Ala; I810D. The I810D mutation makes the BH-site of DMIB similar to the BH-site of *Acanthamoeba* MIA (AMIA) which does not bind acidic phospholipids (9). (B) BH values and BH peak areas of DMIB and the I810D mutant. BH values above 0.6 are in bold and underlined. The areas of peaks with heights above 0.6 are shown at the bottoms of the columns.

FIGURE S3. **Localization of DMIB-N154A and F-actin in waves.** Cells expressing DMIB-N154A (green) were starved for 5 h, fixed and F-actin was visualized with rhodamine-phalloidin (red). Three subsequent Z-slices are shown. Slice thickness is 0.75  $\mu\text{m}$  and slice corresponding to the bottom of the cell is on the top of the figure. Bar is 10  $\mu\text{m}$ .

### SUPPLEMENTAL MOVIES

MOVIE S1. **Relocation of DMIB and F-actin to cell protrusions and cell-cell contacts.** AX3 cells were cotransfected with DMIB (green) and ABD-120 (red) fused to GFP and RFP, respectively. Frames were taken every 20 s and movie is speeded up 60 times. See Fig. 2.

MOVIE S2. **DMIB locates to cell protrusions in randomly moving cell.** GFP-fused DMIB was expressed in AX2 *myoB*<sup>-</sup>-cells. Cells were starved for 2 h. Frames were taken every 20 s and movie is speeded up 60 times. See Fig. 5.

MOVIE S3. **Tail locates uniformly on plasma membrane in randomly moving cell.** GFP-fused Tail was expressed in AX2 *myoB*<sup>-</sup>-cells. Cells were starved for 2 h. Frames were taken every 20 s and movie is speeded up 60 times. See Fig. 5.

MOVIE S4. **DMIB missing GPQ and SH3 domains (dGPQSH3) locates to cell-cell contacts.** GFP-fused DMIB missing GPQ and SH3 domains (dGPQSH3) was expressed in AX2 *myoB*<sup>-</sup>-cells. Cells were starved for 1h. Frames were taken every 20 s and movie is speeded up 60 times. See Fig. 5.

MOVIE S5. **Head+IQ localizes in diffused fashion at the front of migrating cell.** GFP-fused Head+IQ was expressed in AX2 *myoB*<sup>-</sup>-cells. Cells were starved for 6 h. Frames were taken every 20 s and movie is speeded up 60 times. See Fig. 6.

MOVIE S6. **Tail localizes on plasma membrane in migrating cells.** GFP-fused Tail was expressed in AX2 *myoB*<sup>-</sup>-cells. Cells were starved for 6 h. Frames were taken every 20 s and movie is speeded up 60 times. See Fig. 6.

MOVIE S7. **PH-PLC $\delta$  localizes on plasma membrane in migrating cells.** GFP-fused PH-PLC $\delta$  was expressed in AX2 *myoB*<sup>-</sup>-cells. Cells were starved for 6 h. Frames were taken every 20 s and movie is speeded up 60 times. See Fig. 6.

MOVIE S8. **Tail localizes on plasma membrane in streaming cells.** GFP-fused Tail was expressed in AX2 *myoB*<sup>-</sup> cells. Cells were starved for 8 h. Frames were taken every 20 s and movie is speeded up 60 times. See Fig. 7.

MOVIE S9. **PH-PLC $\delta$  localizes to plasma membrane in streaming cells.** GFP-fused PH-PLC $\delta$  was expressed in AX2 *myoB*<sup>-</sup> cells. Cells were starved for 8 h. Frames were taken every 20 s and movie is speeded up 60 times. See Fig. 7.

MOVIE S10. **DMIB missing GPQ and SH3 domains (dGPQSH3) locates to mouth in streaming cells.** GFP-fused DMIB missing GPQ and SH3 domains (dGPQSH3) was expressed in AX2 *myoB*<sup>-</sup> cells. Cells were starved for 8 h. Note that the cell on the top that does not come in contact with other cells shows intense diffuse fluorescence at the front. Frames were taken every 20 s and movie is speeded up 60 times. See Fig. 7.

MOVIE S11. **Head+IQ localizes in cytoplasm in streaming cells.** GFP-fused Head+IQ was expressed in AX2 *myoB*<sup>-</sup> cells. Cells were starved for 8 h. Frames were taken every 20 s and movie is speeded up 60 times. See Fig. 7.

MOVIE S12. **MIB-N154A localizes to actin waves.** GFP-fused MIB-N154A was expressed in AX2 *myoB*<sup>-</sup> cells. Cells were starved for 5h. Frames were taken every 10 s and movie is speeded up 30 times. See Fig. 9 and Fig. S3.

MOVIE S13. **MIB-N154A localizes to actin waves.** GFP-fused MIB-N154A was expressed in AX2 *myoB*<sup>-</sup> cells. Note transient wave location at the cell periphery. Movie is speeded up 30 times. See Fig. 9 and Fig. S3.

**TABLE S1**  
**Oligonucleotides used for creating the GFP-DMIB expression plasmids**

| Mutation  | Description                                                             | Oligonucleotides (name, sequence 5' to 3') |                                                                            |
|-----------|-------------------------------------------------------------------------|--------------------------------------------|----------------------------------------------------------------------------|
| None      | DMIB wild type                                                          | myb2                                       | ccgaattcATGtcaaaaaaagtcaagcc                                               |
| dSH3      | ends at aa 1058                                                         | myb60<br>myb22                             | agatctATGtcaaaaaaagtcaagcc<br>gggggatccTTAtgcagtggtcttgatgg                |
| dGPQ      | deletes aa 922-1057                                                     | myb67/68                                   | gttcaactgattcaactgcaaaagcactctacg                                          |
| dGPQSH3   | ends at aa 921                                                          | mybrmem                                    | cctctagaTTAagtgaatcagttgaac                                                |
| Head + IQ | ends at aa 720                                                          | myb69                                      | ctcgagTTAttgagctctttgttc                                                   |
| Tail      | aa 713 to end                                                           | myb71<br>myb32                             | ggatccCATtctttggaacaagagc<br>cgggatccTTAattatattgaaataatt                  |
| Tail + IQ | aa 698 to end                                                           | myb70<br>myb32                             | ggatccACTgctaaaattcaaaaagc<br>cgggatccTTAattatattgaaataatt                 |
| dBH       | deletes BH region: aa 801-812                                           | myb61/62                                   | gttgagaaatcaatagttggttacgtgaaattaaagg                                      |
| BH-Ala    | KKK803AAA; RR812 AA<br>replaces 5 basic residues in BH<br>region with A | myb65/66                                   | <b>gctgcagcag</b> ttttggtcatactttgatt <b>gcagca</b> gttggttacgtgaaattaaagg |
| I810D     | mutation of BH region                                                   | myb72/73                                   | gaaagttttggtcatacttt <b>ggacc</b> gtcgtgttggttacgtg                        |
| S332A     | weakens motor activity                                                  | myb9/10                                    | ggtaatcgtcgt <b>gca</b> acctataacg                                         |
| E407K     | weakens actin binding                                                   | myb78/79                                   | gtatcaattttgaaata <b>aaa</b> agcttcaacaattctttattg                         |

Note that all expression plasmids that include the motor were generated using myb60 as the forward primer, except for the wild type plasmid that was generated using a myb2 PCR product. All full-length plasmids include the native 3' end of the *myoB* gene. Nucleotides indicated in bold encode the altered amino acids, nucleotides in capital letters are either the first amino acid after the restriction site used for cloning or stop codon. Oligonucleotide names with two numbers separated by / indicate forward and reverse primer pairs.

Fig S1

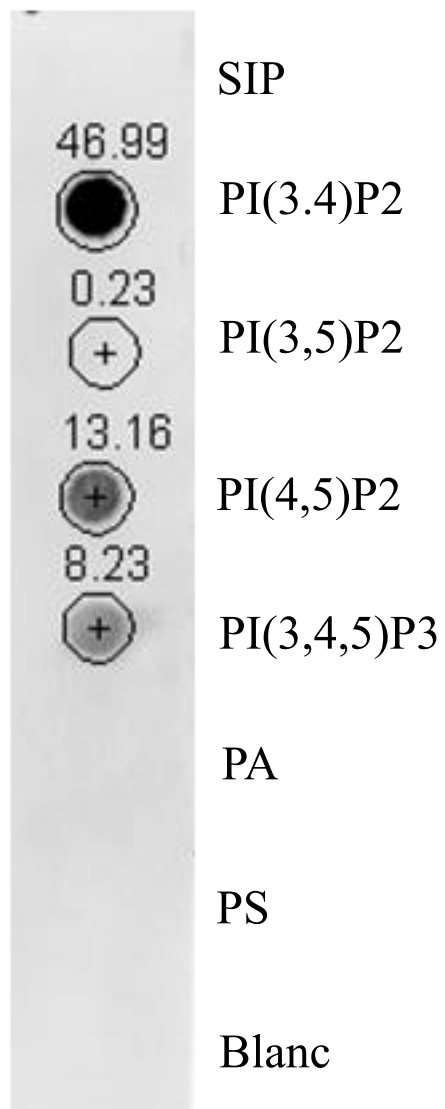

Fig S2A

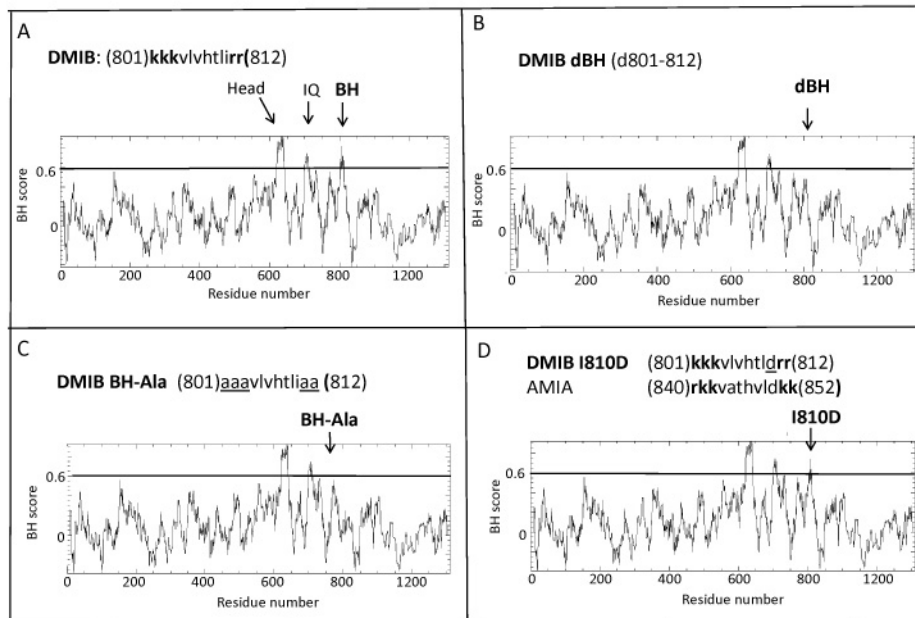

Fig S2B

| <b>DMIB</b>              |                     | <b>DMIB I810D</b> |                     |
|--------------------------|---------------------|-------------------|---------------------|
| aar                      | BH value            | aar               | BH value            |
| 801k                     | 0.502               | 801k              | 0.421               |
| 802k                     | <b><u>0.616</u></b> | 802k              | 0.535               |
| 803k                     | <b><u>0.692</u></b> | 803k              | 0.611               |
| 804v                     | <b><u>0.638</u></b> | 804v              | 0.557               |
| 805l                     | 0.578               | 805l              | 0.497               |
| 806v                     | <b><u>0.612</u></b> | 806v              | 0.531               |
| 807h                     | <b><u>0.823</u></b> | 807h              | <b><u>0.742</u></b> |
| 808t                     | <b><u>0.612</u></b> | 808t              | 0.531               |
| 809l                     | <b><u>0.635</u></b> | 809l              | 0.554               |
| 810i                     | <b><u>0.724</u></b> | 810d              | <b><u>0.643</u></b> |
| 811r                     | <b><u>0.618</u></b> | 811r              | 0.537               |
| 812r                     | 0.509               | 812r              | 0.428               |
| Peak area<br>(above 0.6) | <b>0.57</b>         |                   | <b>0.187</b>        |

Fig S3

MIB-N154A

F-actin

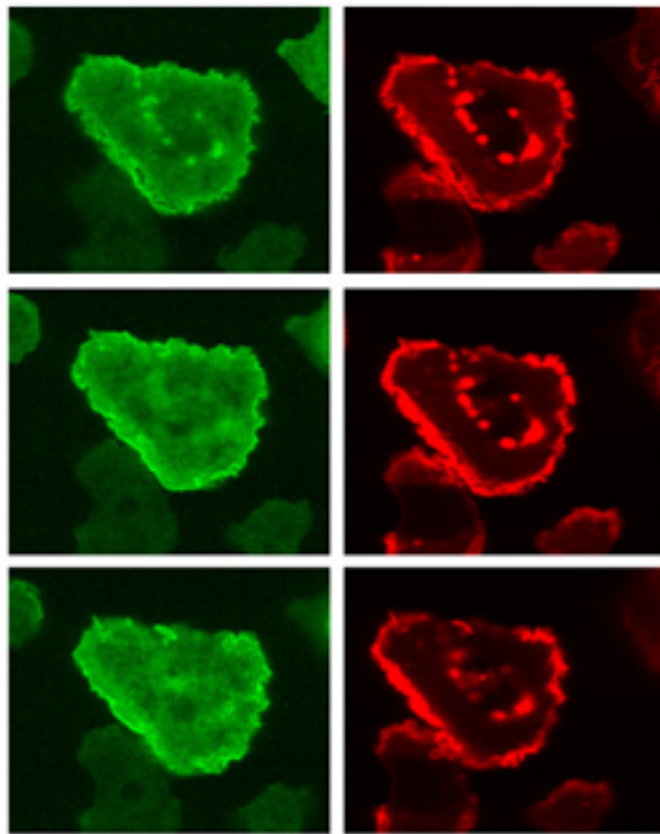

Supplement: supp_M111.318667_jbc.M111.318667-1.pdf [file supp_M111.318667_jbc.M111.318667-1.pdf]
